# Supplementary material for: Hematologic safety of 177Lu-PSMA-617 radioligand therapy in patients with metastatic castration-resistant prostate cancer
Source: Springer Nature journal article supplement (doi:10.1186/s13550-021-00805-7), 2021-07-03
Supplement: MOESM1 [file 13550_2021_805_MOESM1_ESM.pdf]

# FIGURE S1

A

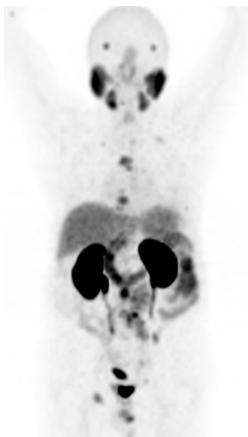

**Category 1**  
( $\leq 20$  bone lesions)

B

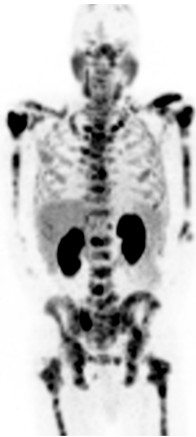

**Category 2**  
(disseminated/diffuse)
